# Supplementary material for: Phlorotannin and Pigment Content of Native Canopy-Forming Sargassaceae Species Living in Intertidal Rockpools in Brittany (France): Any Relationship with Their Vertical Distribution and Phenology?
Source: MDPI journal article supplement (doi:10.3390/md19090504), 2021-09-04
Supplement: s1 [file s1]

Supplementary material for Jégou et al. “**Phlorotannin and pigment content of native canopy-forming Sargassaceae species living in intertidal rockpools in Brittany (France): any relationship with their vertical distribution and phenology?**”

**Table S1.** Results of the two-way ANOVA (pigment levels as a function of the species and tidal height of settlement), Df: degree of freedom, Significant results are highlighted.

|                     | Chlorophyll <i>a</i> |       |                  | Chlorophyll <i>c2</i> |      |              | Fucoxanthin |       |                  |
|---------------------|----------------------|-------|------------------|-----------------------|------|--------------|-------------|-------|------------------|
|                     | Df                   | F     | p                | Df                    | F    | p            | Df          | F     | p                |
| <b>Species</b>      | 4                    | 11.60 | <b>&lt;0.001</b> | 4                     | 6.73 | <b>0.002</b> | 4           | 9.09  | <b>&lt;0.001</b> |
| <b>Tidal height</b> | 2                    | 9.91  | <b>0.002</b>     | 2                     | 3.24 | 0.065        | 2           | 16.66 | <b>&lt;0.001</b> |
| <b>Interaction</b>  | 1                    | 0.08  | 0.778            | 1                     | 1.25 | 0.280        | 1           | 2.46  | 0.136            |

  

|                     | $\beta$ -carotene |       |                  | Violaxanthin |       |              | Zeaxanthin |       |                  |
|---------------------|-------------------|-------|------------------|--------------|-------|--------------|------------|-------|------------------|
|                     | Df                | F     | p                | Df           | F     | p            | Df         | F     | p                |
| <b>Species</b>      | 4                 | 13.05 | <b>&lt;0.001</b> | 4            | 5.20  | <b>0.007</b> | 4          | 15.53 | <b>&lt;0.001</b> |
| <b>Tidal height</b> | 2                 | 2.36  | 0.126            | 2            | 3.64  | <b>0.049</b> | 2          | 0.47  | 0.634            |
| <b>Interaction</b>  | 1                 | 0.13  | 0.724            | 1            | 0.042 | 0.840        | 1          | 1.31  | 0.269            |

**Table S2.** Correlation between pigment levels according to Pearson’s test; all indicated values are significant ( $p < 0.001$ ), n.s.: no significant correlation ( $\beta$ -car:  $\beta$ -carotene; Chl: chlorophyll; Fuco: fucoxanthin; Viola: violaxanthin and Zea: zeaxanthin).

|               | $\beta$ -car | Chl <i>a</i> | Chl <i>c2</i> | Fuco | Viola | Zea  |
|---------------|--------------|--------------|---------------|------|-------|------|
| $\beta$ -car  | -            | 0.74         | 0.81          | 0.71 | 0.87  | n.s. |
| Chl <i>a</i>  |              |              | 0.80          | 0.90 | 0.84  | n.s. |
| Chl <i>c2</i> |              |              |               | 0.85 | 0.88  | n.s. |
| Fuco          |              |              |               |      | 0.85  | n.s. |
| Viola         |              |              |               |      |       | n.s. |
| Zea           |              |              |               |      |       | -    |

**Table S3.** Solvent gradient used during HPLC analysis of pigments in *Cystoseira*, *Ericaria* and *Gongolaria* species

| Time (min) | Flow<br>(mL/min) | % A | % B | % C | Event           |
|------------|------------------|-----|-----|-----|-----------------|
| 0          | 1                | 90  | 10  | 0   | Injection       |
| 1          | 1                | 0   | 100 | 0   | Linear gradient |
| 11         | 1                | 0   | 78  | 22  | Linear gradient |
| 27.5       | 1                | 0   | 10  | 90  | Linear gradient |
| 29         | 1                | 0   | 100 | 0   | Linear gradient |
| 36         | 1                | 90  | 10  | 0   | Equilibration   |
